# Supplementary material for: Depth image upsampling based on guided filter with low gradient minimization
Source: Springer Nature journal article supplement (doi:10.1007/s00371-019-01748-w), 2019-09-13
Supplement: 371_2019_1748_MOESM1_ESM.pdf [file 371_2019_1748_MOESM1_ESM.pdf]

# Depth Image Upsampling based on Guided Filter with Low Gradient Minimization

Hang Yang · Zhongbo Zhang

Received: date / Accepted: date

## 1 Overview

In this supplementary material, we consider the solution of following equation:

$$\sum_i \min_{x_i} \{(x_i - p_i)^2 + \alpha H^t(p_i)\} \quad (1)$$

where

$$H^t(p) = \begin{cases} 0 & \text{if } p = 0 \\ t & \text{if } 0 < |p| \leq 1 \\ 1 & \text{if } |p| > 1 \end{cases} \quad (2)$$

Each single term w.r.t. pixel  $p_i$  in Eq. (2) is

$$E(p) = \min_p (x - p)^2 + \alpha H^t(p) \quad (3)$$

**Theorem 1** When  $|x| \geq 1$ , Eq.(3) reaches its minimum  $E_p^*$  under the condition

$$p = \begin{cases} 0 & \text{if } |x| \leq \min(\frac{1+\alpha t}{2}, \sqrt{\alpha}) \\ \text{sgn}(x) & \text{if } \frac{1+\alpha t}{2} < |x| \leq 1 + \sqrt{\alpha(1-t)} \\ x & \text{if } |x| > \max(1 + \sqrt{\alpha(1-t)}, \sqrt{\alpha}) \end{cases} \quad (4)$$

In our submission, we have give the proofs of Theorem 1.1.

In order to make the proof more intuitive, in Fig.2, we show the relationship of three functions  $1 + \sqrt{\alpha(1-t)}$ ,  $\sqrt{\alpha}$  and  $\frac{1+\alpha t}{2}$ .

---

H. Yang  
Changchun Institute of Optics, Fine Mechanics and Physics,  
Chinese Academy of Science, Changchun 130033, China.  
Tel.: +86-0431-86176563  
Fax: +86-0431-86176399  
E-mail: yanghang09@mails.jlu.edu.cn

Zhongbo Zhang  
Departments of Mathematics, Jilin University, Changchun,  
130012, China.

**Theorem 2** When  $|x| \geq 1$ , and  $\alpha > \frac{2-t+2\sqrt{1-t}}{t^2}$ , Eq.(3) reaches its minimum  $E_p^*$  under the condition

$$p = \begin{cases} 0 & \text{if } |x| \leq \sqrt{\alpha} \\ x & \text{if } |x| > \sqrt{\alpha} \end{cases} \quad (5)$$

When  $|x| \geq 1$ , and  $\frac{2-t+2\sqrt{1-t}}{t^2} \geq \alpha \geq \frac{2-t-2\sqrt{1-t}}{t^2}$ , Eq.(3) reaches its minimum  $E_p^*$  under the condition

$$p = \begin{cases} 0 & \text{if } |x| \leq \frac{1+\alpha t}{2} \\ \text{sgn}(x) & \text{if } \frac{1+\alpha t}{2} < |x| \leq 1 + \sqrt{\alpha(1-t)} \\ x & \text{if } |x| > 1 + \sqrt{\alpha(1-t)} \end{cases} \quad (6)$$

When  $|x| \geq 1$ , and  $\frac{2-t-2\sqrt{1-t}}{t^2} > \alpha > 0$ , Eq.(3) reaches its minimum  $E_p^*$  under the condition

$$p = \begin{cases} \text{sgn}(x) & \text{if } 1 \leq |x| \leq 1 + \sqrt{\alpha(1-t)} \\ x & \text{if } |x| > 1 + \sqrt{\alpha(1-t)} \end{cases} \quad (7)$$

*Proof* According to Lemma 1.2, we can see that the Eq.(6) is true obviously. We only need to proof the Eq.(5) and (7).

When  $\frac{2-t-2\sqrt{1-t}}{t^2} > \alpha > 0$ , according to Lemma 1.2 and Theorem 1.1, Eq.(3) reaches its minimum  $E_p^*$  under the condition

$$p = \begin{cases} 0 & \text{if } |x| \leq \sqrt{\alpha} \\ \text{sgn}(x) & \text{if } \frac{1+\alpha t}{2} < |x| \leq 1 + \sqrt{\alpha(1-t)} \\ x & \text{if } |x| > \sqrt{\alpha} \end{cases} \quad (8)$$

but according to Lemma 1.2, in this case,  $\frac{1+\alpha t}{2} \leq 1 + \sqrt{\alpha(1-t)}$  is false (see Eq.(12)). Then, Eq.(8) can be reducible to Eq.(5).

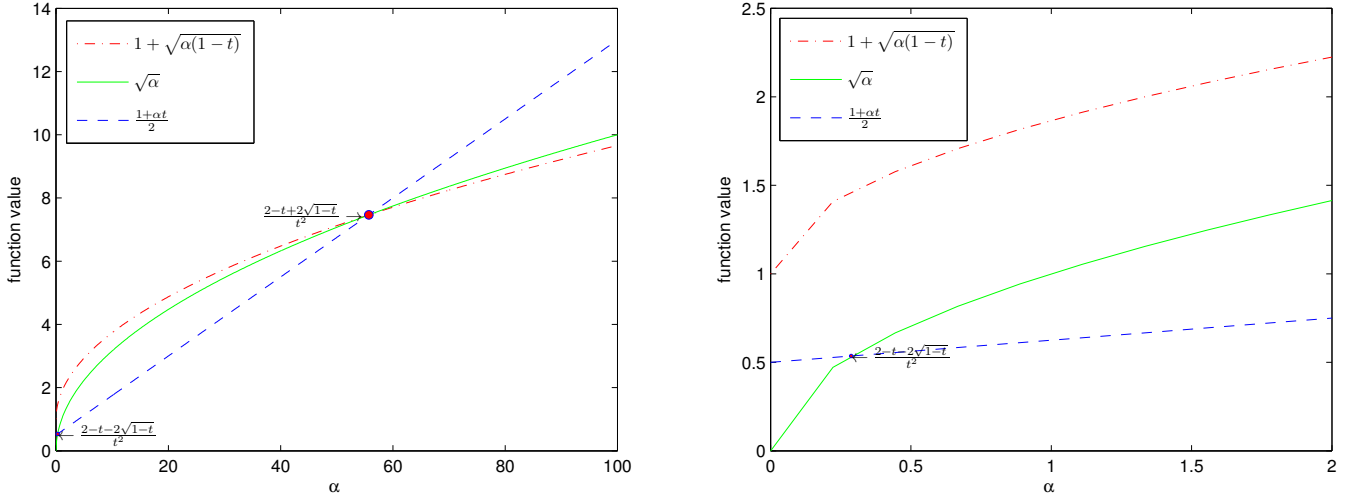

**Fig. 1** The relation of the three curves when  $t = 0.25$ . Left subplot:  $\alpha \in [0, 100]$ . Right subplot:  $\alpha \in [0, 2]$ .

According to Lemma 1.2, when  $\frac{2-t-2\sqrt{1-t}}{t^2} > \alpha > 0$ , Eq.(3) reaches its minimum  $E_p^*$  under the condition

$$p = \begin{cases} 0 & \text{if } |x| \leq \sqrt{\alpha} \\ \text{sgn}(x) & \text{if } \frac{1+\alpha t}{2} < |x| \leq 1 + \sqrt{\alpha(1-t)} \\ x & \text{if } |x| > 1 + \sqrt{\alpha(1-t)} \end{cases} \quad (9)$$

but one can see that  $\sqrt{\alpha} < 1$ ,  $\frac{1+\alpha t}{2} < 1$  in this case, and  $|x| \geq 1$ , so  $|x| \leq \sqrt{\alpha}$  is false. Then, Eq.(9) can be written as Eq.(7). ■

**Lemma 1** If  $0 < t < 1$ , then  $0 < \frac{2-t-2\sqrt{1-t}}{t^2} < 1$

*Proof*

$$\begin{aligned} -3t^2 - t^3 &< 0 \\ (t+2)^2(1-t) &< 4 \\ (1-t)(2+t) &< 2\sqrt{1-t} \\ 2-t-2\sqrt{1-t} &< t^2 \\ \frac{2-t-2\sqrt{1-t}}{t^2} &< 1 \end{aligned} \quad (10)$$

$$\begin{aligned} t^2 &> 0 \\ (2-t)^2 &> 4(1-t) \\ 2-t-2\sqrt{1-t} &> 0 \\ \frac{2-t-2\sqrt{1-t}}{t^2} &> 0 \end{aligned} \quad (11)$$

**Lemma 2** If  $\alpha > \frac{2-t+2\sqrt{1-t}}{t^2}$ , we have

$$\frac{1+\alpha t}{2} > \sqrt{\alpha} > 1 + \sqrt{\alpha(1-t)} \quad (12)$$

If  $\frac{2-t+2\sqrt{1-t}}{t^2} \geq \alpha \geq \frac{2-t-2\sqrt{1-t}}{t^2}$ , we have

$$1 + \sqrt{\alpha(1-t)} \geq \sqrt{\alpha} \geq \frac{1+\alpha t}{2} \quad (13)$$

If  $\frac{2-t-2\sqrt{1-t}}{t^2} > \alpha > 0$ , we have

$$1 + \sqrt{\alpha(1-t)} > \frac{1+\alpha t}{2} > \sqrt{\alpha} \quad (14)$$

*Proof* First, we give a fact,

$$t^2\alpha^2 + (2t-4)\alpha + 1 = 0 \quad (15)$$

because  $t < 1$  and the discriminant value of the equation is  $(2t-4)^2 - 4t^2 = 16(1-t) > 0$ . Then, this equation has two real solutions, they are

$$\alpha = \frac{2-t \pm 2\sqrt{1-t}}{t^2} \quad (16)$$

where  $\frac{2-t+2\sqrt{1-t}}{t^2} > 1$  and according to Lemma 1.1, we have  $\frac{2-t-2\sqrt{1-t}}{t^2} < 1$

1) When  $\alpha > \frac{2-t+2\sqrt{1-t}}{t^2}$ , we can see that  $\alpha > 1$

$$\begin{aligned} t^2\alpha^2 + (2t-4)\alpha + 1 &> 0 \\ (t\alpha+1)^2 &> 4\alpha \\ t\alpha+1 &> 2\sqrt{\alpha} \\ \alpha+1-2\sqrt{\alpha} &> \alpha(1-t) \\ \sqrt{\alpha} &> 1 + \sqrt{\alpha(1-t)} \end{aligned} \quad (17)$$

and

$$\begin{aligned} t^2\alpha^2 + (2t-4)\alpha + 1 &> 0 \\ (t\alpha+1)^2 &> 4\alpha \\ \frac{1+\alpha t}{2} &> \sqrt{\alpha} \end{aligned} \quad (18)$$

$$\begin{aligned}
& 2) \text{When } \frac{2-t+2\sqrt{1-t}}{t^2} \geq \alpha \geq \frac{2-t-2\sqrt{1-t}}{t^2} \\
& t^2\alpha^2 + (2t-4)\alpha + 1 \leq 0 \\
& \quad t\alpha + 1 \leq 2\sqrt{\alpha} \\
& \quad \frac{1+\alpha t}{2} \leq \sqrt{\alpha} \tag{19}
\end{aligned}$$

and when  $\frac{2-t+2\sqrt{1-t}}{t^2} \geq \alpha \geq 1$ , we have

$$\begin{aligned}
& t^2\alpha^2 + (2t-4)\alpha + 1 \leq 0 \\
& \quad (\sqrt{\alpha}-1)^2 \leq \alpha(1-t) \\
& \quad \sqrt{\alpha} \leq 1 + \sqrt{\alpha(1-t)} \tag{20}
\end{aligned}$$

When  $\frac{2-t-2\sqrt{1-t}}{t^2} \leq \alpha < 1$ , we have

$$\sqrt{\alpha} < 1 < 1 + \sqrt{\alpha(1-t)} \tag{21}$$

So, in summary, when  $\frac{2-t+2\sqrt{1-t}}{t^2} \geq \alpha \geq \frac{2-t-2\sqrt{1-t}}{t^2}$ , we have Eq.(21).

3) When  $\frac{2-t-2\sqrt{1-t}}{t^2} > \alpha > 0$ ,

$$t^2\alpha^2 + (2t-4)\alpha + 1 > 0 \tag{22}$$

similar to the Eq.(18), we can obtain  $\frac{1+\alpha t}{2} > \sqrt{\alpha}$ .

And according to Lemma 1.1,  $\alpha < \frac{2-t-2\sqrt{1-t}}{t^2} < 1$ ,

$$\frac{1+\alpha t}{2} < 1 < 1 + \sqrt{\alpha(1-t)} \tag{23}$$

■
